# Supplementary material
Source: Springer Nature journal article supplement (https://www.springermedizin.de/resource/supplementary/12891_2009_653_MOESM1_ESM.pdf/9506480)
Supplement: MOESM1 [file 9506480]

## Assessed for eligibility

743 teams with female players aged 13-17 years in eight regional districts in Sweden

### Excluded: 227 teams

76 teams already using a preventive program  
76 teams declined participation  
75 teams did not respond

## Randomized

516 teams (309 clusters)

### Intervention group

260 teams (154 clusters)

### Control group

256 teams (155 clusters)
